# Supplementary material
Source: PubMed Central journal article supplement (PMC4997238)
Supplement: thnov06p1810s1.pdf [file thnov06p1810s1.pdf]

## SUPPORTING INFORMATION

| Particle                          | Hydrodynamic diameter (nm) | Polydispersity index | Mean zeta potential (mV) |
|-----------------------------------|----------------------------|----------------------|--------------------------|
| ZnONP                             | 134.9                      | 0.278                | -22.6                    |
| Fe <sub>3</sub> O <sub>4</sub> NP | 128.2                      | 0.160                | -18.3                    |
| SiO <sub>2</sub> NP               | 99.9                       | 0.159                | -20.5                    |

Table S1 Summary of the physicochemical properties of nanoparticles.

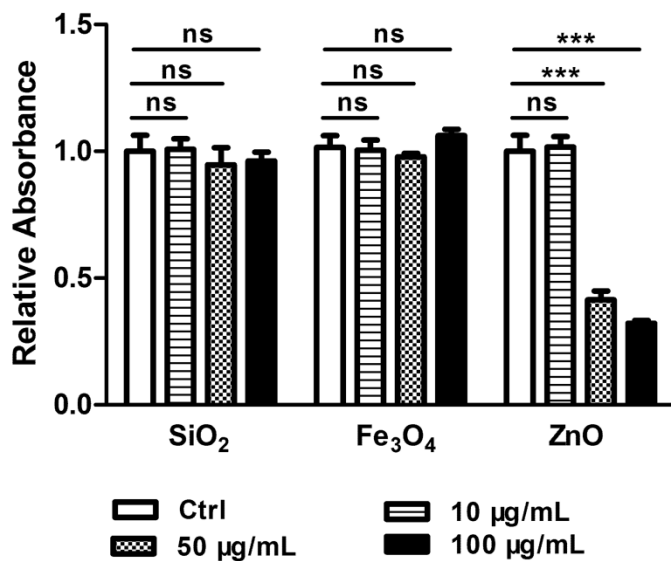

Figure S1 Cytotoxicity of nanoparticles in 293T cells. The cytotoxicity of SiO<sub>2</sub>NPs, Fe<sub>3</sub>O<sub>4</sub>NPs and ZnONPs at indicated concentrations was examined by MTT assay. Data represented as mean  $\pm$  s.d. (n=3). Student's *t*-test, ns not significant; \*\*\* p<0.001.

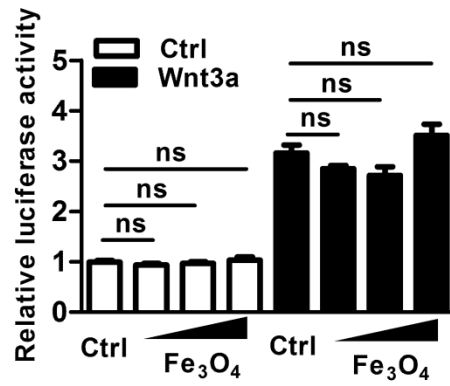

Figure S2 The effect of Fe<sub>3</sub>O<sub>4</sub>NPs (10, 50 and 100 μg/mL) on basal expression and Wnt3a-induced expression of TOPFlash reporter. Data represented as mean ± s.d. (n=3). Student's *t*-test, ns not significant.

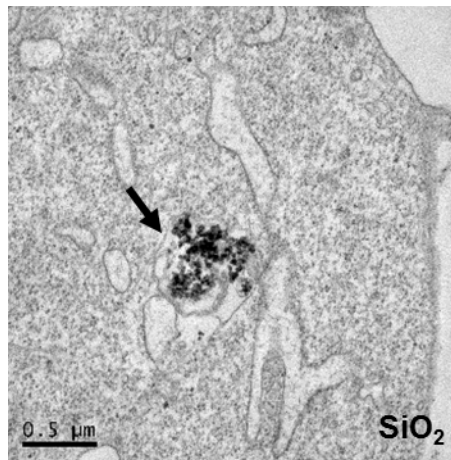

Figure S3 Cellular uptake of SiO<sub>2</sub>NPs. Intracellular localization of SiO<sub>2</sub>NPs was examined with transmission electron microscopy.

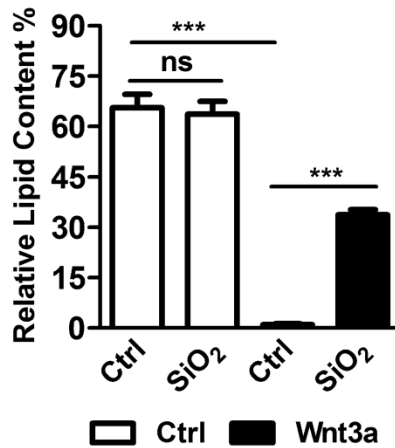

Figure S4 The effect of SiO<sub>2</sub>NPs on adipogenesis in the absence or presence of Wnt3a. Data represented as mean ± s.d. (n=3). Student's *t*-test, ns not significant; \*\*\* *p*<0.001.

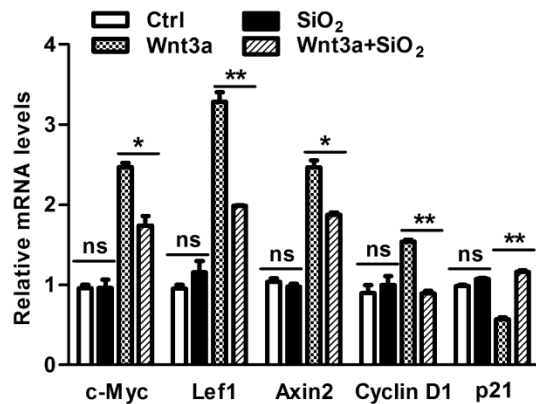

Figure S5 The effect of SiO<sub>2</sub>NPs on expression of Wnt target genes in MDA-MB-231 cells in the absence or presence of Wnt3a. Data represented as mean ± s.d. (n=3). Student's *t*-test, ns not significant; \* *p*<0.05; \*\* *p*<0.01.

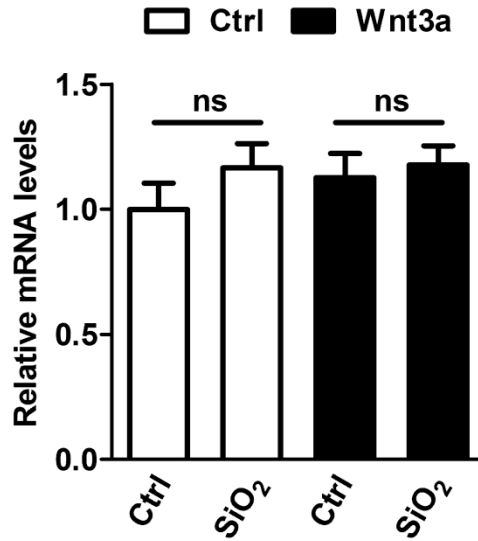

Figure S6 The effect of SiO<sub>2</sub>NPs on mRNA levels of Dvl in the absence or presence of Wnt3a. Data represented as mean ± s.d. (n=3). Student's *t*-test, ns not significant.

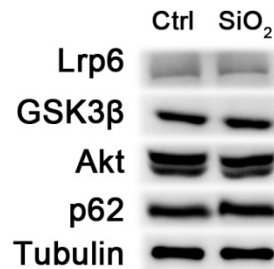

Figure S7 The specificity of SiO<sub>2</sub>NPs on protein degradation in MDA-MB-231 cells. Protein levels of Lrp6, GSK3β, Akt and p62 were examined by western blotting after treatment with 100 μg/mL SiO<sub>2</sub>NPs.

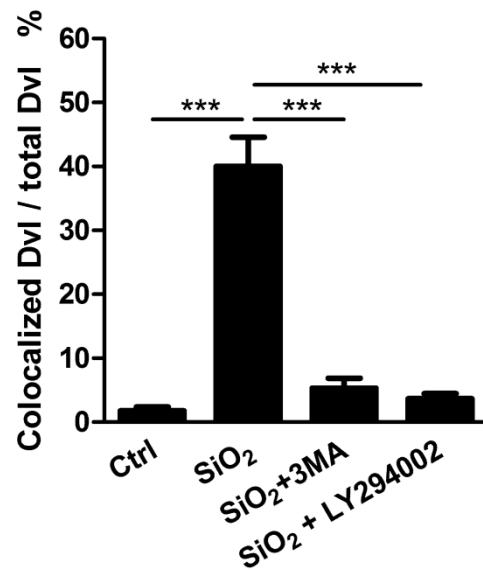

Figure S8 The effect of SiO<sub>2</sub>NPs on lysosomal localization of Dvl in the absence or presence of 3-MA or LY294002. Data represented as mean  $\pm$  s.d. (Eight images for each condition). Student's *t*-test, \*\*\*  $p < 0.001$ .
